# Supplementary material for: Constrained conditional model for screening marker genes through integrated high-throughput transcriptome big data
Source: Research Square preprint supplement (doi:10.21203/rs.3.rs-4858125/v1), 2024-09-11
Supplement: Supplementary file 1 [file 071acc74c453da6dd0437314.xlsx]

## Sheet: Sheet1
Datasets	Species	if single cell?	if cell line?	Samples
GSE174681	human	no	no	10
GSE136825	human	no	no	103
GSE198950	human	no	no	20
GSE72713	human	no	no	9
GSE172305	human	no	no	4
