# Supplementary material for: Constrained conditional model for screening marker genes through integrated high-throughput transcriptome big data
Source: Research Square preprint supplement (doi:10.21203/rs.3.rs-4858125/v1), 2024-09-11
Supplement: Supplementary file 2 [file 08fe5055201cfe0383a16c85.xlsx]

## Sheet: UCEC2023_gene_v6_filtered
Gene	Reported
TUBB4A	contribute to EC carcinogenesis and prognosis (32899298)
MGAT4A	no
IL37	promising factor and/or therapeutic target for EC management (38526176)
HOXB9	promotes endometrial cancer progression (29724991)
NCCRP1	no
ESM1	oncogene to modulate the malignant phenotype of endometrial cancer (36117773)
ELOVL7	hub genes in cancer progression (31788113)
CDKN2A	prediction of progression to endometrial cancer (37503793)
SLC7A10	no
P2RY2	participate in control of the cell cycle of endometrial carcinoma cells (10566654)
SKAP1	no
KCNS1	no
CYP2F1	no
GRHL1	inhibits proliferation of CD8+ T cells in the tumor microenvironment of EC and affect the efficacy of immunotherapy (38586176)
DDC	affects the tumor microenvironment and patient prognosis in endometrial cancer (37872211)
DMBX1	no
CDH18	serve as therapeutic targets for endometrial cancer (37780629)
SIX1	promote endometrial cancer cell development (31579409)
SIRT7	promote the growth of endometrial cancer cells (32558516)
CNTNAP2	no
BCL2L1	no
EEF1A2	no
SLC3A1	no
DLX2	prognostic signature for endometrial cancer (33880037)
EIF4EBP1	correlates with aggressive tumors and prognosis (19428047)
CGN	no
MAP1LC3C	no
ATAD2	Promotes Tumor Growth and Angiogenesis in Endometrial Cancer and Is Associated with Its Immune Infiltration (36479043)
TRPM5	no
