# Supplementary material for: Constrained conditional model for screening marker genes through integrated high-throughput transcriptome big data
Source: Research Square preprint supplement (doi:10.21203/rs.3.rs-4858125/v1), 2024-09-11
Supplement: Supplementary file 3 [file 15c7f9a453145e552bb625ea.xlsx]

## Sheet: Sheet1
siHLTF-1	F: UUAAUCCUGCAAUCUUUUCAG
	R: GAAAAGAUUGCAGGAUUAAGC
siHLTF-2	F: AAUGAGAAGACUAAAGGAGUA
	R: CUCCUUUAGUCUUCUCAUUUA
siHLTF-3	F: UUUGCAAUGCUGUUUUAAGAG
	R: CUUAAAACAGCAUUGCAAAAA
siSKAP1-1	F: UCUCAUUCCGCAAACCUUCUG
	R: GAAGGUUUGCGGAAUGAGAAC
siSKAP1-2	F: UUUACGAUGUCUUCCAUUCCC
	R: GAAUGGAAGACAUCGUAAAAG
siSKAP1-3	F: AUGAUCUUUGCUUUUCUUCUC
	R: GAAGAAAAGCAAAGAUCAUAG
siABCC4-1	F: UCAUCUUCCUCUAAUCUCCGU
	R: GGAGAUUAGAGGAAGAUGAUA
siABCC4-2	F: UUAUACCAGUUAUAACUUCAU
	R: GAAGUUAUAACUGGUAUAAGG
siABCC4-3	F: AUCAAGUAGCAAAAAGGUCUG
	R: GACCUUUUUGCUACUUGAUGA
