# Supplementary material for: Constrained conditional model for screening marker genes through integrated high-throughput transcriptome big data
Source: Research Square preprint supplement (doi:10.21203/rs.3.rs-4858125/v1), 2024-09-11
Supplement: Supplementary file 4 [file 1d98cbc4ca612b37ac8689d4.xlsx]

## Sheet: COVID19_blood_gene_v6_strict
Gene	Linking cancer and covid19
FETUB	new
CT83	new
KLK6	Promotes Tumor Growth and Metastasis by Regulating Cross-Talk between Tumor Cells and Macrophages(36552865)
NOX4	new
ZIC5	Overexpression of ZIC5 promotes proliferation in non-small cell lung cancer (27663664)
