# Supplementary material for: Constrained conditional model for screening marker genes through integrated high-throughput transcriptome big data
Source: Research Square preprint supplement (doi:10.21203/rs.3.rs-4858125/v1), 2024-09-11
Supplement: Supplementary file 5 [file 27c127f6f3720937ddf3f372.xlsx]

## Sheet: Sheet1
Datasets	Species	If single cell?	If cell line?	Samples
GSE102079	human	no	no	257
GSE112790	human	no	no	198
GSE121248	human	no	no	107
GSE51401	human	no	no	64
GSE84005	human	no	no	76
GSE76427	human	no	no	167
GSE36376	human	no	no	433
GSE65486	human	no	no	64
GSE25097	human	no	no	557
GSE156625	human	yes	no	78
GSE162616	human	yes	no	13
GSE149614	human	yes	no	21
GSE57957	human	no	no	78
GSE65485	human	no	no	55
GSE14811	human	no	no	112
GSE77509	human	no	no	60
TCGA-LIHC	human	no	no	425
GSE101432	human	no	no	52
