# Supplementary material for: Constrained conditional model for screening marker genes through integrated high-throughput transcriptome big data
Source: Research Square preprint supplement (doi:10.21203/rs.3.rs-4858125/v1), 2024-09-11
Supplement: Supplementary file 6 [file 2bde7f082d60c590cc500334.xlsx]

## Sheet: Sheet1
Datasets	Species	If single cell?	If cell line?	Samples
GSE75329	human	yes	yes	11
GSE81620	human	yes	yes	18
GSE75369	human	yes	yes	2
GSE106681	human	yes	yes	12
GSE55343	human	no	yes	26
