# Supplementary material for: Constrained conditional model for screening marker genes through integrated high-throughput transcriptome big data
Source: Research Square preprint supplement (doi:10.21203/rs.3.rs-4858125/v1), 2024-09-11
Supplement: Supplementary file 7 [file 357e68a75b7c7cc0aa1a4d4f.xlsx]

## Sheet: COVID19_lung_gene_v6_strict
Gene	Linking cancer and covid19
PTX3	pan-cancer prognostic biomarker and potential biomarker of COVID19 (36139597)
PON2	new
CTSL	Association of CTSL expression with susceptibility to SARS-CoV-2 (35414771)
SDCBP	new
ANXA2	new
IL11	Infleucing Cancer and COVID-19 Related Cytokine Storm(35382714)
