# Supplementary material for: Constrained conditional model for screening marker genes through integrated high-throughput transcriptome big data
Source: Research Square preprint supplement (doi:10.21203/rs.3.rs-4858125/v1), 2024-09-11
Supplement: Supplementary file 8 [file 4964d61dc693a4969a5eb24b.xlsx]

## Sheet: AD_metal_genes_top30
Gene	Reported_AD
ARMC8	new
BRD3	Controlling the Phagocytic Activity of Microglia In Vitro: Relevance to Alzheimer's Disease ( 36613460)
CEP350	new
CORO1C	novel and prominent biomarkers (33878365)
CTNNB1	regulate amyloid beta precursor mRNA/protein expression and effected the learning and memory (35237419)
CUX1	engage in AD progression (22622826)
DUSP8	new
DYNC1LI2	new
EIF4EBP2	new
ELF2	attenuating phosphorylation of eIF2α may restore hippocampal protein synthesis and delay cognitive decline in AD patients (33531382)
EPHA1	Alzheimer's disease risk genes in pathogenesis (24951455)
FNBP1L	AD candidate loci that yielded consistent rare-variant signals in discovery and replication cohorts (33797837)
FOXN3	new
FSTL1	exacerbated autophagy-mediated neuronal damage and NF-κB-stimulated inflammation in Alzheimer's disease (37655275)
GCNT2	new
GPLD1	suppress Aβ production in an AD model (31996371)
GRIN2B	involved in synaptic functioning and engage in AD pathogenesis (24292895)
HP1BP3	inhibit cognitive deficits in Alzheimer's disease brain district (30549219)
HSPB8	inhibition of amyloid-beta protein aggregation and cerebrovascular amyloid-beta toxicity (16485107)
INPP4A	new
KCMF1	new
MED13	potentially enhance the risk of AD (38354736)
MRAS	new
NAV2	associated with the risk and age at onset of Alzheimer's disease (28778446)
NCL	new
NFKBIA	diagnostic biomarkers of oxidative stress, immunological characterization and experimental validation in Alzheimer's disease (37801482)
NPY1R	mediate effect of Abeta (19614678)
OTUD4	new
P2RX7	engage in neuroinflammation and implications in AD pathogenesis (33577858)
PBRM1	new
PEX26	new
POGK	new
PRKD1	new
PTPRB	correlate with cortical amyloid deposition (34602488)
RAB11FIP3	new
RHOBTB3	candidate vulnerability gene for AD (23705665)
RPP14	new
RPRD2	new
SLC12A2	therapeutic target for AD (35458638)
SMAD2	promote spatial learning and memory deficits in Alzheimer's disease (28366226)
SMURF2	new
SOS1	common pathogenesis marker of Alzheimer's disease and type 2 diabetes mellitus (36923118)
TNS3	new
WNK1	common marker for Alzheimer's disease and cardiovascular disease (18842138)
ZHX3	new
ZMYND8	new
