# Supplementary material for: Constrained conditional model for screening marker genes through integrated high-throughput transcriptome big data
Source: Research Square preprint supplement (doi:10.21203/rs.3.rs-4858125/v1), 2024-09-11
Supplement: Supplementary file 9 [file 498226043973497526916fb2.xlsx]

## Sheet: Sheet1
Primer	Primer Sequnce（5’-3’）
HLTF forward primer	CTAAAGGCAGGGCGAAAGGA
HLTF reverse primer	TTCTTTGACCCCTCCACTGC
SKAP1 forward primer	GCACTCGACGAAAAGGAGAC
SKAP1 reverse primer	GATGAACGTGCCTCTTCCCA
ABCC4 forward primer	TGGAGGAGGAAATGTAACCGAG
ABCC4 reverse primer	CGGCAGCAAATCATCCAAGTG
GAPDH forward primer	AAAGCCTGCCGGTGACTAAC
GAPDH reverse primer	TTCCCGTTCTCAGCCTTGAC
