# Supplementary material for: Constrained conditional model for screening marker genes through integrated high-throughput transcriptome big data
Source: Research Square preprint supplement (doi:10.21203/rs.3.rs-4858125/v1), 2024-09-11
Supplement: Supplementary file 10 [file 51902009ff2705ae80c61042.xlsx]

## Sheet: Sheet1
Datasets	Species	if single cell?	if cell line?	Samples
GSE198256	human	no	no	34
GSE211979	human	no	no	21
GSE154998	human	no	no	14
GSE167000	human	no	no	95
GSE162562	human	no	no	108
GSE161918	human	no	no	241
GSE172114	human	no	no	69
GSE152641	human	no	no	86
