# Supplementary material for: Constrained conditional model for screening marker genes through integrated high-throughput transcriptome big data
Source: Research Square preprint supplement (doi:10.21203/rs.3.rs-4858125/v1), 2024-09-11
Supplement: Supplementary file 11 [file 5d1cb053144e56ece1722e03.xlsx]

## Sheet: Sheet1
Datasets	Species	if single cell?	if cell line?	Samples
GSE12685	human	no	no	14
GSE84422	human	no	no	2004
GSE117584	human	no	no	10
GSE117585	human	no	no	11
GSE117586	human	no	no	10
GSE16759	human	no	no	16
GSE5281	human	no	no	161
GSE110226	human	no	no	20
GSE15222	human	no	no	363
GSE32645	human	no	no	12
GSE13214	human	no	no	128
GSE110732	human	no	no	154
