# Supplementary material for: Constrained conditional model for screening marker genes through integrated high-throughput transcriptome big data
Source: Research Square preprint supplement (doi:10.21203/rs.3.rs-4858125/v1), 2024-09-11
Supplement: Supplementary file 12 [file 5fdc002476c01fb5479930b3.xlsx]

## Sheet: Table_S4
Gene	Reported
IHH	regulate proliferation in androgen-dependent prostate cells (22131072)
TCF7L2	induces enzalutamide resistance via NED in CaP (31536510)
VEGFA	associated with CRPC progression (38474084)
ABCC4	new
HBEGF	new
