# Supplementary material for: Constrained conditional model for screening marker genes through integrated high-throughput transcriptome big data
Source: Research Square preprint supplement (doi:10.21203/rs.3.rs-4858125/v1), 2024-09-11
Supplement: Supplementary file 13 [file 668a9e4abae86f19f30b651b.xlsx]

## Sheet: Sheet1
Datasets	Species	if single cell?	if cell line?	Samples
GSE206635	human	no	no	5
GSE147507	human	no	yes	110
GSE152641	human	no	no	86
GSE205099	human	no	no	64
GSE186460	human	no	no	32
