# Supplementary material for: Constrained conditional model for screening marker genes through integrated high-throughput transcriptome big data
Source: Research Square preprint supplement (doi:10.21203/rs.3.rs-4858125/v1), 2024-09-11
Supplement: Supplementary file 14 [file 82f0cddec47b7dfdb7fee80b.xlsx]

## Sheet: Obesity_V_genes_top30
Gene	Reported
ASAH1	improving adipose health and combating obesity and cardiometabolic disease (33352310)
LRPPRC	Reduces Blood Lipid Levels (27462273)
PARVA	new
NDUFA5	promotes mitochondrial dysfunction and hepatosteatosis (30324697)
DUSP3	inhibits obesity, non-alcoholic steatohepatitis and hepatocellular carcinoma (33712680)
MAP2K1	new
DPM1	new
DKK1	promoted adipogenesis in cells with a low degree of differentiation (22447857)
ADORA2B	elevated gene expression level is associated with hyperglycemia (23956030)
MICB	new
CDKN2B	contributes to subcutaneous adipose tissue expandability (24680834)
CAPN9	new
PTGER3	Regulates Diet-Induced Adiposity (26485614)
ERAP1	new
LILRB3	new
ALAS2	prevent the obesity in dogs and be potentially useful for diagnosis of mild to moderate obesity (34258471)
RND2	new
MAN2B2	new
SLC39A1	associated with inflammatory markers in obese women (24488210)
CISD1	in association with obesity-associated dysfunctional adipogenesis in human visceral adipose tissue (26692580)
CWF19L1	potential visceral adipose tissue-specific targets for type 2 diabetes (37540242)
SMYD3	new regulator of adipocyte precursor proliferation (38148333)
CHD7	new
ETNK2	new
RIC8B	new
TBC1D10B	new
A4GNT	new
CLPTM1L	new
SLC41A2	new
CPXM1	positive regulator of adipogenesis (27006448)
NANOS1	methylation in newborns may change the risk of having excess body weight (37546290)
