# Supplementary material for: Constrained conditional model for screening marker genes through integrated high-throughput transcriptome big data
Source: Research Square preprint supplement (doi:10.21203/rs.3.rs-4858125/v1), 2024-09-11
Supplement: Supplementary file 15 [file b1d4b2d3d6e937d54a37f061.xlsx]

## Sheet: Sheet1
Datasets	Species	If single cell?	If cell line?	Samples
GSE183185	human	no	no	60
TCGA-UCEC	human	no	no	587
GSE56087	human	no	no	18
GSE146889	human	no	no	176
