# Supplementary material for: Constrained conditional model for screening marker genes through integrated high-throughput transcriptome big data
Source: Research Square preprint supplement (doi:10.21203/rs.3.rs-4858125/v1), 2024-09-11
Supplement: Supplementary file 16 [file b7cf2ab5487995c866fc6735.xlsx]

## Sheet: Aging_immunity_genes_top30
Gene	Reported
ADAM10	promote cognitive senescence (35841253)
ADD3	mediates adipose-derived stem cells senescence (37605290)
AGFG1	promote H2O2 induced extensive DNA damage, ATP depletion, and severe cytotoxicity (23295411)
ALX3	upregulate secreted factors for multiple hair morphogenesis and hair-growth-related pathways (35777353)
AQR	Promotes Endothelial Cell Senescence (35270021)
ARHGAP5	new
ATP9B	new
BRD7	contributes to endothelial cell senescence (26802028)
CASC4	new
CCAR1	inhibit stress resistance, motility, longevity, and proteostasis (30003683)
CD5L	novel potential biomarkers for renal aging (33159023)
COL4A3BP	contribute to deterioration of mitochondrial structure and function in aging oocytes (23246342)
CPEB4	prevents muscle stem cell senescence during aging (37321216)
DMTF1	new
FAM167B	new
FBXO11	governs C. elegans developmental timing and maturation (24613396)
GNAQ	Protects PC12 Cells from Oxidative Damage (32253686)
HAPLN2	Contributes to Protein Aggregation and Neurodegeneration (27601993)
HOOK3	as SHED target in improving cognitive ability and reversed memory loss (34598900)
IARS	new
ITPR2	promote cellular senescence and aging (33526781)
KCNJ3	new
L3MBTL3	new
LARS	regulate senescence stability under the control of mTOR (34928935)
LRP1B	significant/protective for successful aging without cognitive decline (19367585)
MARK1	new
MBNL2	new
MEF2A	key regulator of cognitive potential and confers resilience to neurodegeneration ; inhibit cellular senescence in human coronary endothelial cells(34731014; 30885136)
MIB1	promotes cellular senescence (32652764)
MIXL1	new
MPHOSPH9	new
MYO5A	new
NR5A2	potential target for exercise to improve metabolic syndrome (37053002)
NUAK1	Regulation of ploidy and senescence (19927127)
PAN3	new
PARN	regulate telomere shortening (31448843)
PARP15	new
PHKB	new
PHLDA3	age-associated genes that identify senescent cells (37648885)
PLEKHA1	biomarker for abdominal age (35418184)
PNPLA8	new
PPHLN1	new
PRDM16	inhibit Age-Dependent Cardiac Hypertrophy, Adverse Remodeling, Mitochondrial Dysfunction, and Heart Failure (33086060)
PROX1	promote Hematopoietic stem cell regeneration (35703178)
PZP	new
RAP1A	Platelet biomarkers for a descending cognitive function (33942972)
ROR1	new
SGSM1	new
SOS1	play a crucial role in the quiescence and ageing of cells (23708325)
SP4	new
STIM2	protects from memory imprecision (32222058)
TAF2	new
TANK	related to functional impairment in innate immunity caused by aging (35849213)
TMEM178A	new
TMEM240	new
TMOD4	new
TNKS	related to telomere biology (36221106)
TPO	neuroprotective in central neural system in inhibiting neuronal apoptosis (32341206)
U2SURP	new
UBR3	new
UIMC1	suppresses genomic instability induced by interstrand cross-links (32797166)
URI1	new
USP25	contributes to defective neurogenesis and cognitive impairments (37171286)
VANGL2	Regulates Adult Hippocampal Neurogenesis and Age-Related Decline in Cognitive Flexibility (35370613)
VPS13A	genetically responsible for cognitive impairment (28446873)
VWA3B	new
ZFC3H1	new
ZFR	new
ZMYND11	contributing to cellular senescence according to telomere length (19944017)
