# Supplementary material for: Constrained conditional model for screening marker genes through integrated high-throughput transcriptome big data
Source: Research Square preprint supplement (doi:10.21203/rs.3.rs-4858125/v1), 2024-09-11
Supplement: Supplementary file 17 [file b8808c1157f55d40e6575c6b.xlsx]

## Sheet: LIHC2021_gene_v6_addsc
Gene	Reported
ILF2	Stimulate Malignant Phenotypes of Liver Cancer Cells (30881868)
PKM	contributes to tumorigenesis, metastasis, stemness, macrophage polarization, and infiltration in hepatocellular carcinoma (36880413)
GPAA1	associated with gene amplification in hepatocellular carcinoma (16642471)
EIF6	promotes the malignant progression of human hepatocellular carcinoma (34016142)
HSPB1P1	predictor for poorer overall survival of patients with HCC and may be potential therapeutic target against HCC (31985034)
HLTF	new
TIPRL	contributes to cancer aggressiveness (31727942)
PDIA3P1	promotes cell proliferation, migration and invasion, and suppresses apoptosis in hepatocellular carcinoma (28823960)
NELFE	oncogenic protein that may contribute to transcriptome imbalance in HCC (28697339)
