# Supplementary material for: Constrained conditional model for screening marker genes through integrated high-throughput transcriptome big data
Source: Research Square preprint supplement (doi:10.21203/rs.3.rs-4858125/v1), 2024-09-11
Supplement: Supplementary file 18 [file ca2b95fb571c5bda2abbd993.xlsx]

## Sheet: Sheet1
Datasets	Species	if single cell?	if cell line?	Samples
GSE29718	human	no	no	20
GSE55008	human	no	no	7
GDS4276	human	no	no	20
GSE24883	human	no	no	64
GSE88837	human	no	no	30
GDS3679	human	no	no	28
GSE128021	human	no	no	6
