# Supplementary material for: Constrained conditional model for screening marker genes through integrated high-throughput transcriptome big data
Source: Research Square preprint supplement (doi:10.21203/rs.3.rs-4858125/v1), 2024-09-11
Supplement: Supplementary file 19 [file ccffd173e6e8c9c200bd9abf.xlsx]

## Sheet: CRS_genes_top30
Gene	reported CRS/inflammation
ABCG2	stem cell-related markers in nasal polyps (28280847)
ABI2	new
ARMC3	new
BICD2	might participate in the disease pathogenesis of chronic rhinosinusitis (29253858)
CCDC113	new
CCDC17	new
CCDC74A	new
CCL18	expression in nasal turbinate mucosa corrlates the severity of allergic rhinitis (30102123)
CHST3	increased in IL-4-stimulated macrophages (21471214)
DCDC2B	new
DENND4C	new
DNAH5	implicated as the disease-causing gene of chronic rhinosinusitis (24150548)
DNAL4	new
FDPS	coexisted more frequently with inflammation (27529156)
FUT2	plays an important regulatory role in inflammation, bacterial or viral infection, and tumor metastasis (36473550)
LGALS2	involves in tissue inflammation, immune response and cell apoptosis (36613785)
MIDN	new
NAGA	promote lysozyme and peroxidase activity assessed in peritoneal macrophages in arthritic animals (18987599)
NME7	associated with systemic inflammatory response and respiratory injury (26294199)
PRRC2B	new
RIBC1	new
RTN3	overexperssion mediates inhibitory effects on chondrocyte apoptosis and the inflammatory response (33491257)
SCAF8	new
SPATA18	new
SSH2	associated with inflammation control and arthritis (34273568)
TLR8	engaged in the allergic rhinitis pathogenesis (29398117)
TMEM45A	new
TMEM45B	essential for inflammation-induced hypersensitivity (36322717)
UBE2S	new
WDR78	new
