# Supplementary material for: Constrained conditional model for screening marker genes through integrated high-throughput transcriptome big data
Source: Research Square preprint supplement (doi:10.21203/rs.3.rs-4858125/v1), 2024-09-11
Supplement: Supplementary file 20 [file d42448292cf0ba2fc7b499a1.xlsx]

## Sheet: Sheet1
Datasets	Species	if single cell?	if cell line?	Samples
GSE213516	human	yes	no	17
GSE136184	human	yes	no	16
GSE149319	human	no	no	24
GSE140592	human	no	yes	6
GSE103232	human	no	no	32
GSE169009	human	no	no	12
GSE153100	human	no	no	14
GSE161469	human	no	no	14
GSE112289	human	no	no	23
GSE193141	human	no	no	159
