# Supplementary material for: Constrained conditional model for screening marker genes through integrated high-throughput transcriptome big data
Source: Research Square preprint supplement (doi:10.21203/rs.3.rs-4858125/v1), 2024-09-11
Supplement: Supplementary file 21 [file deac8d49296dfb5ed1175981.xlsx]

## Sheet: Sheet1
Datasets	Species	If single cell?	If cell line?	Samples
GSE120065	human	yes	no	52
GSE110009	human	yes	no	76
GSE222300	human	yes	no	3
GSE200997	human	yes	no	23
GSE95132	human	no	no	31
TCGA-COAD	human	no	no	521
GSE14526	human	no	no	16
GSE30292	human	no	yes	43
GSE64392	human	no	no	37
GSE93253	human	no	no	7
GSE44861	human	no	no	111
