# Supplementary material for: Constrained conditional model for screening marker genes through integrated high-throughput transcriptome big data
Source: Research Square preprint supplement (doi:10.21203/rs.3.rs-4858125/v1), 2024-09-11
Supplement: Supplementary file 22 [file df521194cc334e4ad605eff4.xlsx]

## Sheet: Sheet1
Datasets	Species	If single cell?	If cell line?	Samples
GSE46602	human	no	no	50
GSE32982	human	no	no	9
GSE88808	human	no	no	98
GSE27616	human	no	no	13
GSE72220	human	no	no	147
GSE71781	human	no	no	40
GSE71783	human	no	no	30
GSE181294	human	yes	no	51
GSE135520	human	yes	no	7
TCGA-PRAD	human	no	no	551
GSE21034	human	no	no	370
GSE104131	human	no	no	32
GSE89223	human	no	no	32
GSE134073	human	no	no	64
