# Supplementary material for: Constrained conditional model for screening marker genes through integrated high-throughput transcriptome big data
Source: Research Square preprint supplement (doi:10.21203/rs.3.rs-4858125/v1), 2024-09-11
Supplement: Supplementary file 23 [file ec6e49b0516f8579c2267ec7.xlsx]

## Sheet: BRCA_tamoxifen_res_surv_gene_v6
Gene	Reported
AMTN	new
ANTXR2	Involved in Breast and Prostate Cancer Progression (36316045)
CASP4	promote apoptosis in tamoxifen resistant breast tumor cells (24178758)
CCNA1	correlates with treatment response to doxorubicin and 5-fluorouracil in locally advanced breast tumors (25294903)
CDH23	novel biomarkers for breast cancer prognosis (33899544)
FOXP2	suppresses breast cancer cell proliferation (36988377)
LGR6	Promotes Tumor Proliferation and Metastasis through Wnt/beta-Catenin Signaling (32775619)
PRTFDC1	new
RAB39A	new
RAET1L	new
