# Supplementary material for: Constrained conditional model for screening marker genes through integrated high-throughput transcriptome big data
Source: Research Square preprint supplement (doi:10.21203/rs.3.rs-4858125/v1), 2024-09-11
Supplement: Supplementary file 24 [file f8d691d9536ab2c2829250ef.xlsx]

## Sheet: COAD2021_gene_v70_sc_v2
Gene	Reported
ETF1	new
ATP5H	new
ICT1	Correlates with Unfavorable Prognosis and Survival in Patients with Colorectal Cancer (27411551)
KPNA2	promotes colorectal cancer development by activating the PI3K/AKT pathway (33322891)
FAM84A	enhanced migration of human colon cancer cells (16820875)
HRASLS	new
PRB2	may play important roles in the proliferation and differentiation of normal and neoplastic human colonic mucosa (9136893)
PRRT1	new
DFNA5	regulates immune cells infiltration and exhaustion in COAD (35248047)
PRDX4	expressed at significantly higher levels in colon tumors with metastasis (14719106)
TNFAIP8L3	strongly associated with the development of colon cancer (30586922)
TUBA8	new
FENDRR	Correlates with Tumor Immunogenicity for colon cancer (30157490)
